# Supplementary material for: Molecular epidemiology of hepatitis B virus infection in Norway
Source: BMC Infect Dis. 2019 Mar 7;19:236. doi: 10.1186/s12879-019-3868-8 (PMC6407267; doi:10.1186/s12879-019-3868-8)
Supplement: Supplementary file 1 — Table S1. List of 355 publically available sequences, with meta-information, included in the phylogenetic analysis. (XLSX 20 kb) [file 12879_2019_3868_MOESM1_ESM.xlsx]

## Sheet: FINAL
Genotype	Country	Region	Year isolated	Accession number
D	Japan	Asia	2001	AB109475.1
D	Japan	Asia	1997	AB109477.1
A	Cameroon	Africa	1994	AB194952.1
E	Ghana	Africa	2000	AB205191.1
H	Japan	Asia	2005	AB266536.1
D	Mongolia	Asia	2005	AB270542.1
A	Tajikistan	Asia	2006	AB330372.1
C	Japan	Asia	2004	AB485808.1
B	Japan	Asia	2005	AB602818.1
A	Japan	Asia	2005	AB697493.1
C	Japan	Asia	2007	AB697510.1
B	Japan	Asia	2012	AB828708.1
B	Indonesia	Asia	1995	AP011089.1
C	Indonesia	Asia	2003	AP011105.1
D	Belarus	Europe	2005	EU414121.1
D	Belarus	Europe	2005	EU414126.1
A	Belarus	Europe	2005	EU414133.1
D	Belarus	Europe	2005	EU414137.1
B	Taiwan	Asia	2002	EU882003.1
B	Taiwan	Asia	2002	EU919161.1
C	China	Asia	2007	EU939613.1
D	Belgium	Europe	2005	FJ349205.1
D	Belgium	Europe	1998	FJ349208.1
D	Belgium	Europe	1998	FJ349209.1
D	Belgium	Europe	1999	FJ349218.1
D	Belgium	Europe	2005	FJ349228.1
E	Belgium	Europe	2007	FJ349238.1
A	Gabon	Africa	2004	FJ349296.1
H	Argentina	South America	2008	FJ356716.1
B	China	Asia	2007	FJ386654.1
C	China	Asia	2008	FJ560993.1
B	China	Asia	2008	FJ561007.1
C	China	Asia	2008	FJ561031.1
C	China	Asia	2008	FJ561035.1
C	China	Asia	2008	FJ561046.1
C	China	Asia	2007	FJ562218.1
C	China	Asia	2007	FJ562268.1
B	China	Asia	2008	FJ621628.1
B	China	Asia	2008	FJ621631.1
B	China	Asia	2008	FJ621739.1
B	China	Asia	2008	FJ621748.1
B	China	Asia	2008	FJ621778.1
C	China	Asia	2008	FJ621902.1
C	China	Asia	2008	FJ622031.1
C	China	Asia	2008	FJ622103.1
D	China	Asia	2008	FJ622870.1
D	Haiti	Central America	2006	FJ692507.2
A	Haiti	Central America	2006	FJ692564.1
A	Haiti	Central America	2006	FJ692571.1
A	Haiti	Central America	2006	FJ692574.1
C	China	Asia	2006	FJ751352.1
C	China	Asia	2006	FJ751485.1
C	China	Asia	2006	FJ751500.1
C	China	Asia	2006	FJ751569.1
D	Tunisia	Africa	2006	FJ904396.1
D	Tunisia	Africa	2006	FJ904398.1
D	Tunisia	Africa	2005	FJ904399.1
D	Tunisia	Africa	2006	FJ904400.1
D	Tunisia	Africa	2006	FJ904406.1
D	Tunisia	Africa	2006	FJ904412.1
D	Tunisia	Africa	2006	FJ904432.1
E	Guinea	Africa	2006	GQ161782.1
E	Guinea	Africa	2006	GQ161785.1
E	Guinea	Africa	2006	GQ161795.1
E	Guinea	Africa	2006	GQ161797.1
E	Guinea	Africa	2006	GQ161807.1
A	Guinea	Africa	2006	GQ161813.1
E	Guinea	Africa	2006	GQ161814.1
E	Guinea	Africa	2006	GQ161816.1
E	Guinea	Africa	2006	GQ161827.1
E	Guinea	Africa	2006	GQ161829.1
E	Guinea	Africa	2006	GQ161830.1
E	Guinea	Africa	2006	GQ161834.1
E	Guinea	Africa	2006	GQ161836.1
D	India	Asia	2009	GQ183470.1
B	USA	North America	2007	GQ325791.1
B	USA	North America	2007	GQ325794.1
B	USA	North America	2007	GQ325797.1
A	Belgium	Europe/Africa	1998	GQ331047.1
B	Indonesia	Asia	2005	GQ358140.1
D	China	Asia	2007	GQ377589.1
B	China	Asia	2007	GQ377595.1
B	China	Asia	2007	GQ377612.1
C	China	Asia	2008	GQ377633.1
B	China	Asia	2008	GQ377634.1
C	South Korea	Asia	2008	GQ475308.1
C	South Korea	Asia	2008	GQ475310.1
C	South Korea	Asia	2008	GQ475313.1
C	South Korea	Asia	2008	GQ475314.1
C	South Korea	Asia	2008	GQ475317.1
C	South Korea	Asia	2008	GQ475319.1
C	South Korea	Asia	2008	GQ475320.1
C	South Korea	Asia	2008	GQ475322.1
C	South Korea	Asia	2008	GQ475324.1
C	South Korea	Asia	2008	GQ475325.1
A	Poland	Europe	2006	GQ477483.1
A	Poland	Europe	2006	GQ477496.1
A	Poland	Europe	2006	GQ477498.1
D	New Zealand	Oceania	2005	GQ486040.1
D	Australia	Oceania	2005	GQ486048.1
D	Germany	Europe	2005	GQ486110.1
D	New Zealand	Oceania	2005	GQ486114.1
D	Bulgaria	Europe	2005	GQ486115.1
D	Bulgaria	Europe	2005	GQ486134.1
B	Australia	Oceania	2006	GQ486141.1
D	Turkey	Europe	2006	GQ486162.1
D	New Zealand	Oceania	2006	GQ486201.1
A	USA	North America	2006	GQ486203.1
C	Czech Republic	Europe	2005	GQ486246.1
C	Canada	North America	2006	GQ486272.1
D	Greece	Europe	2006	GQ486279.1
D	Germany	Europe	2006	GQ486294.1
D	United Kingdom	Europe	2006	GQ486337.1
D	France	Europe	2005	GQ486404.1
D	Bulgaria	Europe	2005	GQ486433.1
B	New Zealand	Oceania	2005	GQ486443.1
C	Germany	Europe	2005	GQ486462.1
B	USA	North America	2006	GQ486464.1
D	Netherlands	Europe	2005	GQ486475.1
B	Canada	North America	2006	GQ486501.1
D	Czech Republic	Europe	2005	GQ486503.1
A	USA	North America	2006	GQ486510.1
C	Canada	North America	2006	GQ486516.1
C	Australia	Oceania	2005	GQ486518.1
D	Bulgaria	Europe	2006	GQ486520.1
D	Bulgaria	Europe	2006	GQ486527.1
C	Canada	North America	2005	GQ486534.1
B	Canada	North America	2006	GQ486559.1
D	Turkey	Europe	2006	GQ486566.1
B	Germany	Europe	2005	GQ486569.1
A	Poland	Europe	2006	GQ486583.1
C	New	Zealand	2005	GQ486606.1
C	Australia	Oceania	2005	GQ486607.1
B	USA	North America	2006	GQ486620.1
B	Australia	Oceania	2006	GQ486657.1
A	Germany	Europe	2006	GQ486668.1
D	Germany	Europe	2006	GQ486670.1
D	Germany	Europe	2006	GQ486680.1
C	USA	North America	2007	GQ486687.1
C	USA	North America	2007	GQ486690.1
A	Germany	Europe	2006	GQ486693.1
D	Germany	Europe	2006	GQ486714.1
D	France	Europe	2007	GQ486717.1
D	Germany	Europe	2007	GQ486722.1
C	France	Europe	2006	GQ486742.1
B	USA	North America	2006	GQ486752.1
B	Malaysia	Asia	2006	GQ924608.1
C	Malaysia	Asia	2006	GQ924613.1
B	Malaysia	Asia	2007	GQ924656.1
C	China	Asia	2007	GU079401.1
D	Iran	Asia	2007	GU456647.1
D	Iran	Asia	2007	GU456648.1
D	Iran	Asia	2007	GU456650.1
D	Iran	Asia	2007	GU456655.1
D	Iran	Asia	2007	GU456664.1
D	Iran	Asia	2007	GU456670.1
D	Iran	Asia	2007	GU456680.1
A	Belgium	Europe	2005	GU563545.1
A	Belgium	Europe	2003	GU563547.1
A	Belgium	Europe	2000	GU563548.1
A	Belgium	Europe	2001	GU563553.1
A	India	Asia	2008	GU798964.1
C	India	Asia	2008	GU798968.1
C	India	Asia	2008	GU798975.1
C	India	Asia	2008	GU798996.1
A	India	Asia	2008	GU799009.1
D	India	Asia	2009	GU799050.1
H	Mexico	North America	2008	HM066946.2
E	Nigeria	Africa	2007	HM363567.1
E	Nigeria	Africa	2007	HM363571.1
E	Nigeria	Africa	2007	HM363578.1
E	Nigeria	Africa	2007	HM363594.1
E	Nigeria	Africa	2007	HM363610.1
A	Nigeria	Africa	2007	HM363612.1
A	Nigeria	Africa	2007	HM363613.1
F	Chile	South America	2010	HM590472.1
G	China	Asia	2010	HQ231885.1
D	Serbia	Europe	2007	HQ236014.1
D	Serbia	Europe	2007	HQ236016.1
D	New Zealand	Oceania	1984	HQ700441.1
D	New Zealand	Oceania	1984	HQ700447.1
D	New Zealand	Oceania	1984	HQ700450.1
D	New Zealand	Oceania	1984	HQ700454.1
D	New Zealand	Oceania	1993	HQ700459.1
D	New Zealand	Oceania	1984	HQ700460.1
D	New Zealand	Oceania	2003	HQ700510.1
D	Iran	Asia	2006	JN040759.1
D	Iran	Asia	2009	JN040785.1
D	Iran	Asia	2007	JN040791.1
D	Iran	Asia	2008	JN040792.1
D	Iran	Asia	2008	JN040794.1
D	Iran	Asia	2009	JN040796.1
D	Iran	Asia	2009	JN040797.1
D	Iran	Asia	2007	JN040805.1
D	Iran	Asia	2006	JN040826.1
A	South Africa	Africa	2009	JN182326.1
A	South Africa	Africa	2009	JN182329.1
D	Syria	Asia	2009	JN257155.1
D	Syria	Asia	2009	JN257157.1
D	Syria	Asia	2009	JN257158.1
D	Syria	Asia	2009	JN257171.1
D	Syria	Asia	2010	JN257179.1
D	Syria	Asia	2010	JN257180.1
D	Syria	Asia	2008	JN257185.1
D	Syria	Asia	2010	JN257209.1
B	USA	North America	2006	JN604119.1
C	USA	North America	2006	JN604121.1
C	USA	North America	2006	JN604131.1
C	USA	North America	2006	JN604144.1
E	USA	North America	2008	JN604166.1
A	USA	North America	2007	JN604169.1
D	USA	North America	2006	JN604206.1
D	USA	North America	2006	JN604207.1
B	USA	North America	2006	JN604223.1
A	USA	North America	2008	JN604248.1
B	USA	North America	2006	JN604253.1
C	USA	North America	2006	JN604256.1
A	USA	North America	2006	JN604260.1
A	USA	North America	2006	JN604261.1
C	USA	North America	2006	JN604281.1
A	USA	North America	2007	JN604282.1
B	USA	North America	2006	JN604284.1
D	USA	North America	2008	JN604295.1
D	USA	North America	2006	JN604313.1
F	Argentina	South America	2009	JN688699.2
D	Argentina	South America	2010	JN688708.2
F	Argentina	South America	2010	JN688709.2
F	USA	North America	1988	JN792913.1
F	USA	North America	1980	JN792915.1
A	Brazil	South America	2008	JN983840.1
A	Brazil	South America	2009	JN983869.1
A	Brazil	South America	2009	JN983884.1
C	Malaysia	Asia	2009	JQ027327.1
C	China	Asia	2005	JQ040133.1
B	Vietnam	Asia	2008	JQ281172.1
B	Vietnam	Asia	2008	JQ281185.1
B	Vietnam	Asia	2008	JQ281204.1
B	Vietnam	Asia	2009	JQ281215.1
B	Vietnam	Asia	2009	JQ281249.1
B	China	Asia	2010	JQ416187.1
B	China	Asia	2010	JQ416188.1
C	China	Asia	2008	JQ416308.1
D	India	Asia	2008	JQ514334.1
D	India	Asia	2010	JQ514373.1
A	India	Asia	2008	JQ514382.1
A	India	Asia	2008	JQ514383.1
A	India	Asia	2009	JQ514405.1
C	India	Asia	2009	JQ514407.1
D	India	Asia	2007	JQ514468.1
A	India	Asia	2007	JQ514504.1
A	India	Asia	2008	JQ514506.1
D	India	Asia	2008	JQ514515.1
C	India	Asia	2010	JQ514539.1
C	Bangladesh	Asia	2008	JQ514540.1
D	Serbia	Europe	2008	JQ687530.1
D	Serbia	Europe	2008	JQ687532.1
C	China	Asia	2006	JQ688403.1
G	USA	North America	2001	JQ707472.1
A	USA	North America	2000	JQ707627.1
A	USA	North America	2000	JQ707633.1
A	USA	North America	2000	JQ707636.1
G	USA	North America	2003	JQ707680.1
C	Thailand	Asia	2009	JQ801470.1
C	Thailand	Asia	2009	JQ801475.1
C	Thailand	Asia	2009	JQ801484.1
C	Thailand	Asia	2009	JQ801486.1
C	Thailand	Asia	2009	JQ801492.1
C	Thailand	Asia	2009	JQ801501.1
C	Thailand	Asia	2009	JQ801502.1
C	Thailand	Asia	2009	JQ801504.1
B	Thailand	Asia	2009	JQ801512.1
C	Thailand	Asia	2009	JQ801520.1
C	Thailand	Asia	2009	JQ801522.1
D	Russia	Asia	2005	JX090618.1
D	Russia	Asia	2005	JX090620.1
D	Russia	Asia	2000	JX090627.1
D	Russia	Asia	2005	JX090653.1
D	Russia	Asia	1997	JX090661.1
D	Russia	Asia	2006	JX090685.1
D	Russia	Asia	1993	JX090693.1
D	Russia	Asia	1993	JX090695.1
D	Russia	Asia	1993	JX090696.1
D	Russia	Asia	2005	JX090699.1
D	Russia	Asia	2000	JX090702.1
A	Kenya	Africa	2010	JX154581.1
A	Kenya	Africa	2010	JX154582.1
C	Panama	Central America	2003	JX870001.1
D	Sweden	Europe	1996	JX898693.1
D	Sweden	Europe	2008	JX898694.1
D	Sweden	Europe	2008	JX898695.1
D	Sweden	Europe	2008	JX898696.1
C	Thailand	Asia	2007	KC315303.1
C	Thailand	Asia	2007	KC315306.1
B	Thailand	Asia	2007	KC315318.1
C	Thailand	Asia	2007	KC315331.1
F	Brazil	South America	2008	KC494405.1
C	China	Asia	2012	KC774206.1
C	China	Asia	2012	KC774209.1
C	China	Asia	2012	KC774228.1
C	China	Asia	2012	KC774236.1
C	China	Asia	2012	KC774243.1
C	China	Asia	2012	KC774274.1
C	China	Asia	2012	KC774276.1
C	China	Asia	2012	KC774293.1
C	China	Asia	2012	KC774310.1
C	China	Asia	2012	KC774318.1
C	China	Asia	2012	KC774380.1
B	China	Asia	2012	KC774399.1
B	China	Asia	2012	KC774411.1
B	Taiwan	Asia	1989	KC792687.1
B	Taiwan	Asia	1990	KC792784.1
B	Taiwan	Asia	1991	KC792838.1
B	Taiwan	Asia	1991	KC793085.1
A	Japan	Asia	1996	KC836881.1
C	Malaysia	Asia	2012	KF053187.1
D	Pakistan	Asia	2012	KF061168.1
E	Sudan	Africa	2008	KF170742.1
D	Sudan	Africa	2008	KF170744.1
D	Sudan	Africa	2008	KF170745.1
D	Sudan	Africa	2008	KF170747.1
D	Sudan	Africa	2008	KF170772.1
E	Sudan	Africa	2008	KF170786.1
H	Mexico	North America	2012	KF356417.1
D	Iran	Asia	2007	KF471641.1
D	Iran	Asia	2007	KF471652.1
D	Iran	Asia	2007	KF471654.1
D	Iran	Asia	2007	KF471658.1
A	South Africa	Africa	2007	KF476016.1
G	Netherlands	Europe	2003	KF767451.1
E	Angola	Africa	2007	KF849718.1
E	Angola	Africa	2007	KF849719.1
E	Angola	Africa	2007	KF849728.1
C	China	Asia	2012	KJ173323.1
C	China	Asia	2012	KJ173324.1
C	China	Asia	2012	KJ173332.1
B	China	Asia	2012	KJ173361.1
B	China	Asia	2012	KJ173400.1
B	China	Asia	2012	KJ173412.1
B	China	Asia	2012	KJ173423.1
C	Hong Kong	Kong	2012	KJ410489.1
C	Hong Kong	Kong	2012	KJ410496.1
A	India	Asia	2009	KJ533387.1
B	Malaysia	Asia	2012	KJ803764.1
C	Malaysia	Asia	2012	KJ803793.1
C	Malaysia	Asia	2012	KJ803799.1
C	Malaysia	Asia	2013	KJ803818.1
F	Argentina	South America	2013	KJ843170.1
A	Argentina	South America	2012	KJ843182.1
A	Argentina	South America	2013	KJ843218.1
A	Brazil	South America	2007	KJ854686.1
A	Brazil	South America	2007	KJ854702.1
A	Brazil	South America	2007	KJ854705.1
A	Brazil	South America	2007	KJ854706.1
A	Brazil	South America	2007	KJ854709.1
F	Chile	South America	2008	KM233681.1
